# Supplementary material
Source: PubMed Central journal article supplement (PMC9018489)
Supplement: NIHMS1765030-supplement-1.pdf [file NIHMS1765030-supplement-1.pdf]

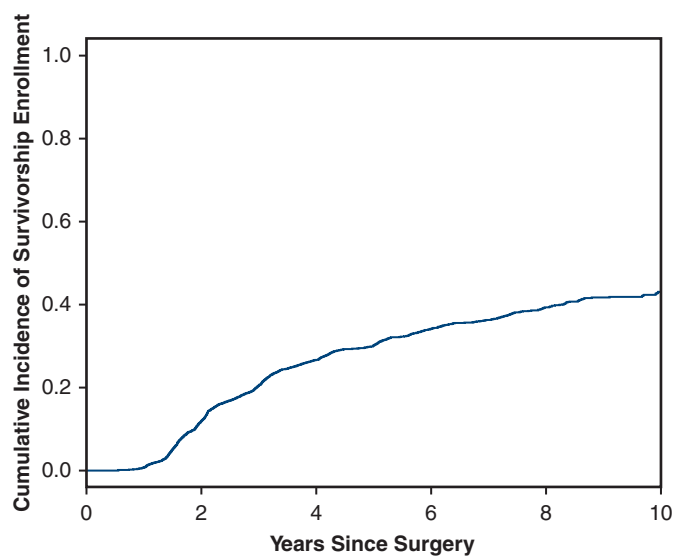

|                          | 0    | 2       | 4       | 6       | 8       | 10      |
|--------------------------|------|---------|---------|---------|---------|---------|
| <b>No. at risk</b>       | 3940 | 3184    | 1885    | 1024    | 525     | 238     |
| <b>Cum Incidence %</b>   |      | 12      | 27      | 34      | 39      | 43      |
| <b>95% Conf Interval</b> |      | (11,13) | (25,28) | (32,36) | (37,41) | (41,45) |

**FIGURE E1.** Cumulative incidence of enrollment in TSP group from the time of surgery (R0 cases).

**TABLE E1. Recurrence rates, second lung primary tumors, and extrathoracic primary tumors and survivorship enrollment (excluding patients with carcinoid tumors)**

|                                                   | Non-TSP | TSP    |
|---------------------------------------------------|---------|--------|
| Recurrence                                        | [2547]  | [1054] |
| Yes                                               | 534     | 76     |
| Recurrence location (n = 610)                     |         |        |
| Distant                                           | 287     | 37     |
| Locoregional                                      | 150     | 25     |
| Distant + locoregional                            | 97      | 14     |
| Second lung primary malignancy                    | [2555]  | [1046] |
| Yes                                               | 319     | 131    |
| Clinical stage of second lung primary (n = 450)   |         |        |
| IA                                                | 259     | 106    |
| IB                                                | 11      | 5      |
| II                                                | 16      | 3      |
| IIIA                                              | 16      | 6      |
| IIIB/C/IV                                         | 17      | 10     |
| Treatment of second lung primary                  |         |        |
| Local (surgery or radiation)                      | 274     | 114    |
| Local and systemic                                | 19      | 6      |
| Systemic                                          | 10      | 6      |
| Observation                                       | 16      | 5      |
| Second extrathoracic malignancy                   | [2578]  | [1023] |
| Yes                                               | 211     | 60     |
| Site of second extrathoracic malignancy (n = 271) |         |        |
| Prostate/kidney/urologic                          | 47      | 16     |
| Breast                                            | 28      | 9      |
| Thyroid                                           | 29      | 5      |
| Other                                             | 107     | 35     |

Each outcome was analyzed separately with regard to TSP enrollment at the time of outcome; thus, the number of patients in TSP is different depending on outcome. [ ] Indicates total patients in TSP or non-TSP analyzed for each outcome. *TSP*, Thoracic Survivorship Program.

**TABLE E2. Multivariable extended Cox model for recurrence**

| Characteristic          | HR   | 95% CI    | P value |
|-------------------------|------|-----------|---------|
| Survivorship            | 0.91 | 0.65-1.26 | .6      |
| Age at surgery          | 1.00 | 0.99-1.00 | .4      |
| Smoking status          |      |           |         |
| Former/current          | —    | —         |         |
| Never                   | 1.49 | 1.32-1.69 | <.001   |
| Sex                     |      |           |         |
| Female                  | —    | —         |         |
| Male                    | 1.20 | 1.02-1.42 | .028    |
| ASA                     |      |           |         |
| ASA I/II                | —    | —         |         |
| ASA III/IV              | 0.95 | 0.78-1.15 | .6      |
| Prior cancer            |      |           |         |
| N                       | —    | —         |         |
| Y                       | 0.98 | 0.81-1.18 | .8      |
| FEV1                    | 1.00 | 0.99-1.00 | .3      |
| Diffusion               | 1.00 | 0.99-1.00 | .3      |
| Induction               |      |           |         |
| No                      | —    | —         |         |
| Yes                     | 1.28 | 0.95-1.72 | .11     |
| Procedure               |      |           |         |
| Bilobectomy             | —    | —         |         |
| Lobectomy               | 0.77 | 0.47-1.27 | .3      |
| Pneumonectomy           | 0.62 | 0.29-1.30 | .2      |
| Sublobar                | 1.19 | 0.75-1.89 | .5      |
| Approach                |      |           |         |
| Open                    | —    | —         |         |
| VATS                    | 0.93 | 0.73-1.18 | .5      |
| Tumor location          |      |           |         |
| Left                    | —    | —         |         |
| Right                   | 0.79 | 0.66-0.95 | .012    |
| Pathology               |      |           |         |
| Adeno                   | —    | —         |         |
| Carcinoid               | 0.36 | 0.26-0.50 | <.001   |
| Other/Large/Pleuro      | 0.91 | 0.65-1.28 | .6      |
| Small cell              | 0.61 | 0.27-1.36 | .2      |
| Squamous                | 0.53 | 0.42-0.67 | <.001   |
| pStage8                 |      |           |         |
| IA                      | —    | —         |         |
| IB                      | 1.87 | 1.35-2.59 | <.001   |
| II                      | 3.21 | 2.40-4.30 | <.001   |
| IIIA                    | 4.56 | 3.37-6.16 | <.001   |
| z0                      | 0.61 | 0.22-1.70 | .3      |
| Adjuvant therapy        |      |           |         |
| Chemorad                | —    | —         |         |
| None                    | 0.86 | 0.62-1.20 | .4      |
| Systemic (chemo/immuno) | 0.97 | 0.72-1.31 | .8      |
| XRT                     | 1.12 | 0.74-1.71 | .6      |
| Year of surgery         | 1.00 | 0.96-1.04 | >.9     |

The model included a time-varying covariate to reflect variable time to TSP enrollment. *HR*, Hazard ratio; *CI*, confidence interval; *ASA*, American Society of Anesthesiology Physical Status Classification System; *FEV1*, forced expiratory volume in 1 second; *VATS*, video-assisted thoracic surgery; *XRT*, radiotherapy.

TABLE E3. Multivariable extended Cox model for second lung primary tumors

| Characteristic              | HR   | 95% CI    | P value |
|-----------------------------|------|-----------|---------|
| Survivorship                | 0.98 | 0.87-1.11 | .8      |
| Age at surgery              | 1.01 | 0.99-1.02 | .4      |
| Smoking status              |      |           |         |
| Former/current              | —    | —         |         |
| Never                       | 0.45 | 0.28-0.74 | .002    |
| Sex                         |      |           |         |
| Female                      | —    | —         |         |
| Male                        | 0.78 | 0.63-0.98 | .033    |
| ASA                         |      |           |         |
| ASA I/II                    | —    | —         |         |
| ASA III/IV                  | 1.07 | 0.89-1.29 | .4      |
| Prior cancer                |      |           |         |
| N                           | —    | —         |         |
| Y                           | 1.02 | 0.86-1.22 | .8      |
| FEV1                        | 0.99 | 0.99-1.00 | .071    |
| Diffusion                   | 1.00 | 0.99-1.00 | .3      |
| Induction                   |      |           |         |
| No                          | —    | —         |         |
| Yes                         | 1.15 | 0.86-1.55 | .3      |
| Procedure                   |      |           |         |
| Bilobectomy                 | —    | —         |         |
| Lobectomy                   | 1.27 | 0.65-2.47 | .5      |
| Pneumonectomy               | 0.40 | 0.13-1.21 | .10     |
| Sublobar                    | 1.57 | 0.87-2.87 | .14     |
| Approach                    |      |           |         |
| Open                        | —    | —         |         |
| VATS                        | 1.17 | 0.86-1.59 | .3      |
| Tumor location              |      |           |         |
| Left                        | —    | —         |         |
| Right                       | 1.23 | 1.05-1.44 | .011    |
| Pathology                   |      |           |         |
| Adeno                       | —    | —         |         |
| Carcinoid                   | 0.25 | 0.14-0.46 | <.001   |
| Other/Large/Pleo            | 1.07 | 0.73-1.57 | .7      |
| Small cell                  | 0.71 | 0.40-1.26 | .2      |
| Squamous                    | 1.15 | 0.98-1.35 | .082    |
| pStage8                     |      |           |         |
| IA                          | —    | —         |         |
| IB                          | 0.81 | 0.65-1.02 | .075    |
| II                          | 0.65 | 0.43-0.97 | .034    |
| IIIA                        | 0.68 | 0.50-0.91 | .011    |
| z0                          | 0.21 | 0.05-0.88 | .032    |
| Adjuvant therapy            |      |           |         |
| Chemorad                    | —    | —         |         |
| None                        | 0.90 | 0.40-1.99 | .8      |
| Systemic (Chemo/<br>Immuno) | 0.99 | 0.44-2.26 | >.9     |
| XRT                         | 0.64 | 0.21-1.94 | .4      |
| Year of surgery             | 1.07 | 1.05-1.10 | <.001   |

The model included a time-varying covariate to reflect variable time to TSP enrollment. *HR*, Hazard ratio; *CI*, confidence interval; *ASA*, American Society of Anesthesiology Physical Status Classification System; *FEV1*, forced expiratory volume in 1 second; *VATS*, video-assisted thoracic surgery; *XRT*, radiotherapy.

TABLE E4. Multivariable extended Cox model for extrathoracic second primary malignancy

| Characteristic              | HR   | 95% CI    | P value |
|-----------------------------|------|-----------|---------|
| Survivorship                | 1.31 | 1.04-1.66 | .023    |
| Age at surgery              | 1.03 | 1.01-1.04 | <.001   |
| Smoking status              |      |           |         |
| Former/current              | —    | —         |         |
| Never                       | 0.96 | 0.67-1.36 | .8      |
| Sex                         |      |           |         |
| Female                      | —    | —         |         |
| Male                        | 1.21 | 0.93-1.57 | .15     |
| ASA                         |      |           |         |
| ASA I/II                    | —    | —         |         |
| ASA III/IV                  | 0.84 | 0.59-1.21 | .4      |
| Prior cancer                |      |           |         |
| N                           | —    | —         |         |
| Y                           | 1.18 | 0.90-1.54 | .2      |
| FEV1                        | 0.99 | 0.98-1.00 | .002    |
| Diffusion                   | 1.01 | 1.01-1.02 | <.001   |
| Induction                   |      |           |         |
| No                          | —    | —         |         |
| Yes                         | 0.80 | 0.51-1.25 | .3      |
| Procedure                   |      |           |         |
| Bilobectomy                 | —    | —         |         |
| Lobectomy                   | 0.63 | 0.24-1.65 | .3      |
| Pneumonectomy               | 0.32 | 0.07-1.42 | .13     |
| Sublobar                    | 0.64 | 0.24-1.68 | .4      |
| Approach                    |      |           |         |
| Open                        | —    | —         |         |
| VATS                        | 0.92 | 0.76-1.13 | .4      |
| Tumor location              |      |           |         |
| Left                        | —    | —         |         |
| Right                       | 1.08 | 0.86-1.35 | .5      |
| Pathology                   |      |           |         |
| Adeno                       | —    | —         |         |
| Carcinoid                   | 1.07 | 0.76-1.51 | .7      |
| Other/Large/Pleo            | 1.22 | 0.71-2.09 | .5      |
| Small cell                  | 0.68 | 0.16-2.89 | .6      |
| Squamous                    | 0.93 | 0.69-1.25 | .6      |
| pStage8                     |      |           |         |
| IA                          | —    | —         |         |
| IB                          | 0.91 | 0.63-1.30 | .6      |
| II                          | 0.80 | 0.55-1.17 | .2      |
| IIIA                        | 0.71 | 0.40-1.28 | .3      |
| z0                          | 0.53 | 0.20-1.41 | .2      |
| Adjuvant therapy            |      |           |         |
| Chemorad                    | —    | —         |         |
| None                        | 0.80 | 0.40-1.63 | .5      |
| Systemic (Chemo/<br>Immuno) | 1.00 | 0.42-2.39 | >.9     |
| XRT                         | 1.60 | 0.63-4.10 | .3      |
| Year of surgery             | 1.05 | 1.01-1.08 | .005    |

The model included a time-varying covariate to reflect variable time to TSP enrollment. *HR*, Hazard ratio; *CI*, confidence interval; *ASA*, American Society of Anesthesiology Physical Status Classification System; *FEV1*, forced expiratory volume in 1 second; *VATS*, video-assisted thoracic surgery; *XRT*, radiotherapy.

TABLE E5. Multivariable extended Cox model for overall survival

| Characteristic              | HR   | 95% CI    | P value |
|-----------------------------|------|-----------|---------|
| Survivorship                | 0.42 | 0.33-0.52 | <.001   |
| Age at surgery              | 1.04 | 1.03-1.05 | <.001   |
| Smoking status              |      |           |         |
| Former/current              | —    | —         |         |
| Never                       | 0.99 | 0.81-1.20 | .9      |
| Sex                         |      |           |         |
| Female                      | —    | —         |         |
| Male                        | 1.26 | 1.08-1.47 | .003    |
| ASA                         |      |           |         |
| ASA I/II                    | —    | —         |         |
| ASA III/IV                  | 1.31 | 1.08-1.58 | .007    |
| Prior cancer                |      |           |         |
| N                           | —    | —         |         |
| Y                           | 1.20 | 1.04-1.40 | .015    |
| FEV1                        | 1.00 | 1.00-1.00 | .2      |
| Diffusion                   | 0.98 | 0.98-0.99 | <.001   |
| Induction                   |      |           |         |
| No                          | —    | —         |         |
| Yes                         | 0.83 | 0.68-1.00 | .054    |
| Procedure                   |      |           |         |
| Bilobectomy                 | —    | —         |         |
| Lobectomy                   | 1.39 | 0.97-1.99 | .077    |
| Pneumonectomy               | 1.30 | 0.80-2.12 | .3      |
| Sublobar                    | 1.59 | 1.13-2.24 | .008    |
| Approach                    |      |           |         |
| Open                        | —    | —         |         |
| VATS                        | 1.02 | 0.87-1.19 | .8      |
| Tumor location              |      |           |         |
| Left                        | —    | —         |         |
| Right                       | 0.97 | 0.86-1.08 | .6      |
| Pathology                   |      |           |         |
| Adeno                       | —    | —         |         |
| Carcinoid                   | 0.75 | 0.60-0.94 | .012    |
| Other/Large/Pleuro          | 1.08 | 0.81-1.45 | .6      |
| Small cell                  | 0.83 | 0.62-1.12 | .2      |
| Squamous                    | 1.19 | 0.97-1.45 | .093    |
| pStage8                     |      |           |         |
| IA                          | —    | —         |         |
| IB                          | 1.49 | 1.30-1.72 | <.001   |
| II                          | 1.53 | 1.32-1.77 | <.001   |
| IIIA                        | 1.90 | 1.56-2.32 | <.001   |
| z0                          | 1.03 | 0.60-1.76 | >.9     |
| Adjuvant therapy            |      |           |         |
| Chemorad                    | —    | —         |         |
| None                        | 0.77 | 0.61-0.97 | .026    |
| Systemic (Chemo/<br>Immuno) | 0.74 | 0.57-0.97 | .030    |
| XRT                         | 1.15 | 0.78-1.70 | .5      |
| Year of surgery             | 0.95 | 0.92-0.98 | .001    |

The model included a time-varying covariate to reflect variable time to TSP enrollment. HR, Hazard ratio; CI, confidence interval; ASA, American Society of Anesthesiology Physical Status Classification System; FEV1, forced expiratory volume in 1 second; VATS, video-assisted thoracic surgery; XRT, radiotherapy.

TABLE E6. Multivariable extended Cox model for disease-free survival

| Characteristic              | HR   | 95% CI    | P value |
|-----------------------------|------|-----------|---------|
| Survivorship                | 0.57 | 0.47-0.69 | <.001   |
| Age at surgery              | 1.02 | 1.02-1.03 | <.001   |
| Smoking status              |      |           |         |
| Former/current              | —    | —         |         |
| Never                       | 1.28 | 1.15-1.42 | <.001   |
| Sex                         |      |           |         |
| Female                      | —    | —         |         |
| Male                        | 1.20 | 1.04-1.38 | .010    |
| ASA                         |      |           |         |
| ASA I/II                    | —    | —         |         |
| ASA III/IV                  | 1.19 | 1.02-1.40 | .031    |
| Prior cancer                |      |           |         |
| N                           | —    | —         |         |
| Y                           | 1.12 | 0.99-1.28 | .082    |
| FEV1                        | 1.00 | 1.00-1.00 | .10     |
| Diffusion                   | 0.99 | 0.99-0.99 | <.001   |
| Induction                   |      |           |         |
| No                          | —    | —         |         |
| Yes                         | 1.03 | 0.84-1.28 | .7      |
| Procedure                   |      |           |         |
| Bilobectomy                 | —    | —         |         |
| Lobectomy                   | 0.94 | 0.59-1.50 | .8      |
| Pneumonectomy               | 0.88 | 0.46-1.67 | .7      |
| Sublobar                    | 1.26 | 0.86-1.83 | .2      |
| Approach                    |      |           |         |
| Open                        | —    | —         |         |
| VATS                        | 0.95 | 0.80-1.13 | .6      |
| Tumor location              |      |           |         |
| Left                        | —    | —         |         |
| Right                       | 0.91 | 0.80-1.03 | .13     |
| Pathology                   |      |           |         |
| Adeno                       | —    | —         |         |
| Carcinoid                   | 0.60 | 0.46-0.79 | <.001   |
| Other/Large/Pleuro          | 1.02 | 0.80-1.30 | .9      |
| Small cell                  | 0.73 | 0.54-0.99 | .045    |
| Squamous                    | 0.96 | 0.78-1.19 | .7      |
| pStage8                     |      |           |         |
| IA                          | —    | —         |         |
| IB                          | 1.52 | 1.33-1.73 | <.001   |
| II                          | 1.86 | 1.63-2.12 | <.001   |
| IIIA                        | 2.46 | 2.04-2.95 | <.001   |
| z0                          | 0.83 | 0.49-1.43 | .5      |
| Adjuvant therapy            |      |           |         |
| Chemorad                    | —    | —         |         |
| None                        | 0.81 | 0.61-1.07 | .14     |
| Systemic (Chemo/<br>Immuno) | 0.82 | 0.60-1.13 | .2      |
| XRT                         | 1.14 | 0.82-1.57 | .4      |
| Year of surgery             | 0.98 | 0.94-1.01 | .15     |

The model included a time-varying covariate to reflect variable time to TSP enrollment. HR, Hazard ratio; CI, confidence interval; ASA, American Society of Anesthesiology Physical Status Classification System; FEV1, forced expiratory volume in 1 second; VATS, video-assisted thoracic surgery; XRT, radiotherapy.
